# Supplementary material for: Homeostatic maintenance via degradation and repair of elastic fibers under tension
Source: PubMed Central journal article supplement (PMC4899696; doi:10.1038/srep27474), 2016-06-09
Supplement: srep27474-s1.pdf [file srep27474-s1.pdf]

## Supplementary Information

Homeostatic maintenance via degradation and repair of elastic fibers  
under tension

Calebe Alves<sup>1,2</sup>, Ascanio D. Araújo<sup>1</sup>, Cláudio L. N. Oliveira<sup>1</sup>, Jasmin  
Imsirovic<sup>2</sup>, Erzsébet Bartolák-Suki<sup>2</sup>, José S. Andrade<sup>1</sup> and Béla  
Suki<sup>2,\*</sup>

<sup>1</sup>Universidade Federal do Ceará, Departamento de Física, Fortaleza,  
CE, 60451-970, Brazil

<sup>2</sup>Boston University, Department of Biomedical Engineering, Boston,  
MA, 02215, USA

\*bsuki@bu.edu

April 13, 2016

### Number of visits to binding sites

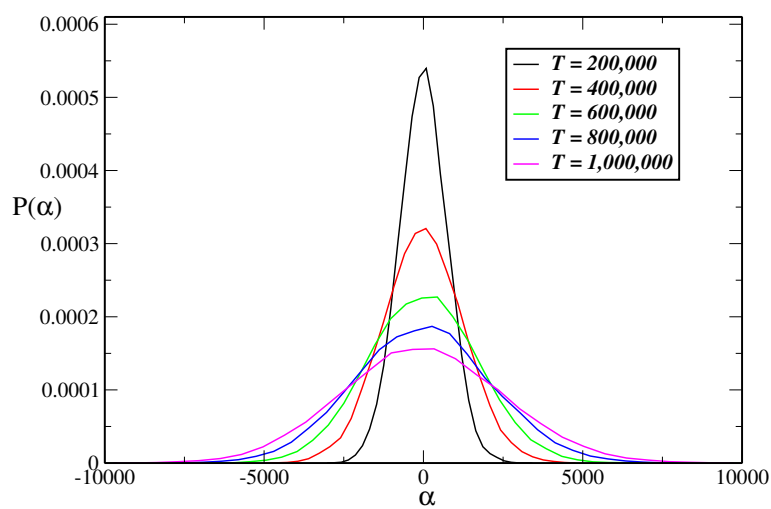

Figure S1: Distribution of  $\alpha_i$  at different times (statistics accumulated over 500 realizations), in the model without control.

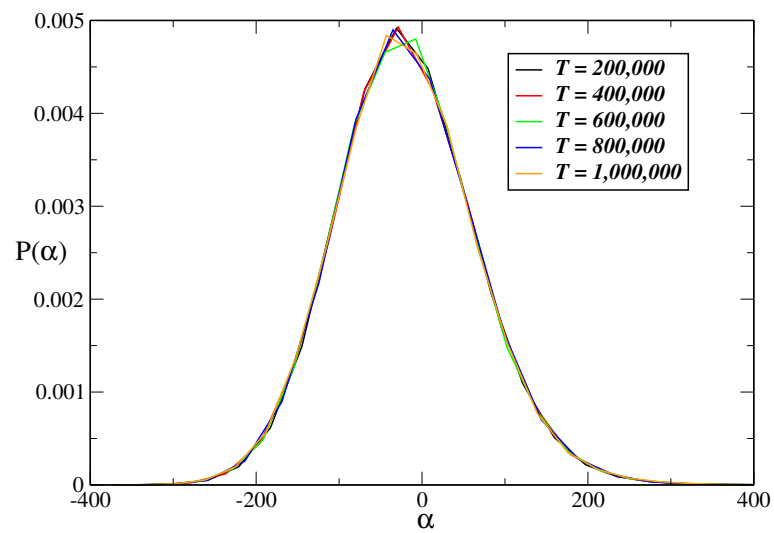

Figure S2: Distribution of  $\alpha_i$  at different times (statistics accumulated over 500 realizations), in the STCM.

# Different number of Diffusion Site Layers

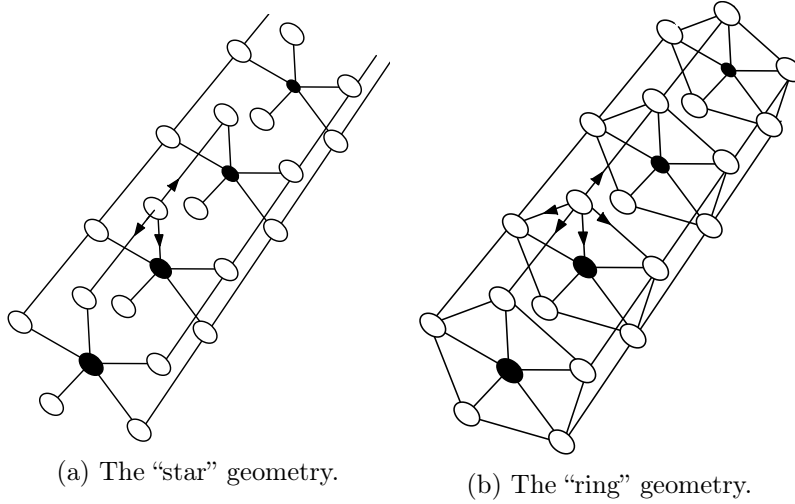

Figure S3: Considered geometries for the fiber.

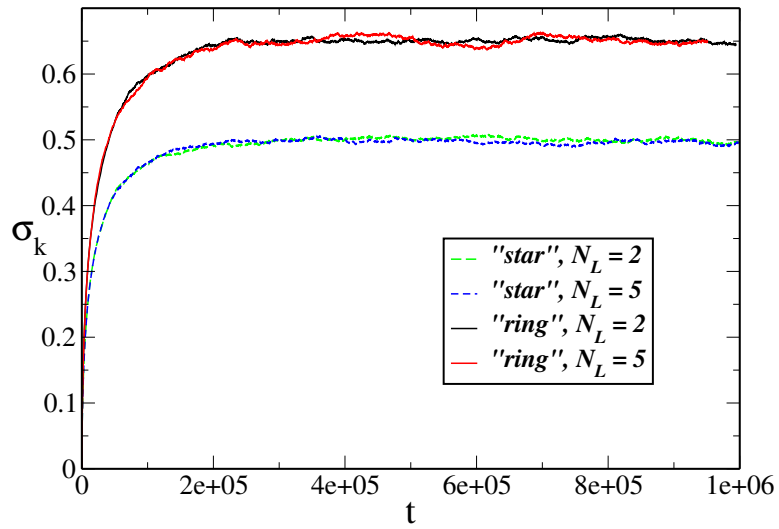

Figure S4: Effect of Different number of layers in the STCM model.

## Effects of Volume Exclusion

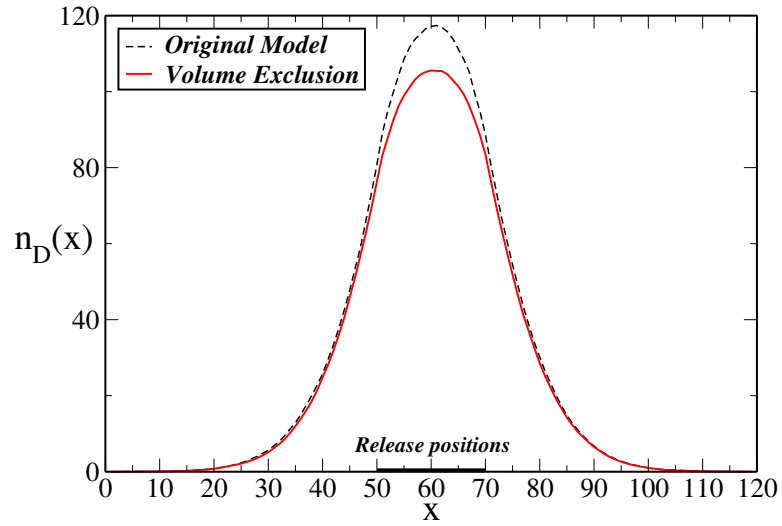

Figure S5: Average number of visits to site  $x$ , when there's no control and 20 particles are released on the central sites as shown, after  $T = 10^3$  timesteps. These central sites are less visited than they are in original model. Distributions obtained from 40,000 realizations in the model without control.

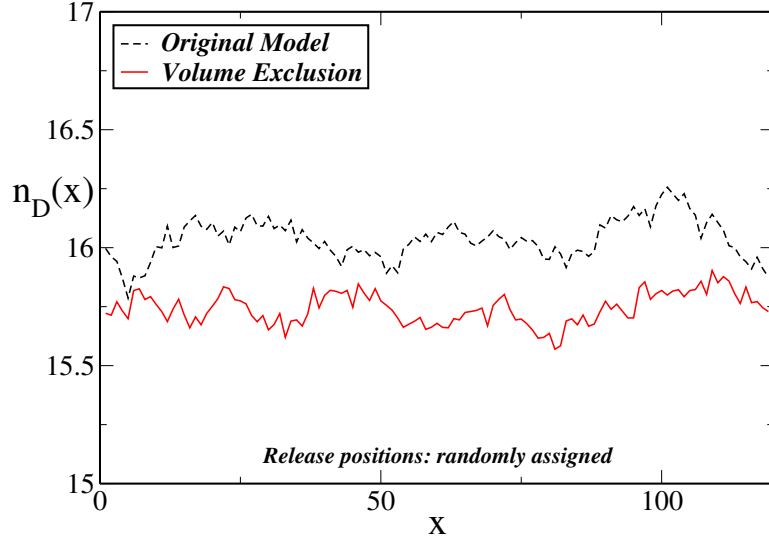

Figure S6: Average number of visits to site  $x$ , when there's no control and particles are released at random positions, after  $T = 10^3$  timesteps. All sites are less visited than they are in original model. Averages obtained from 40,000 realizations in the model without control.

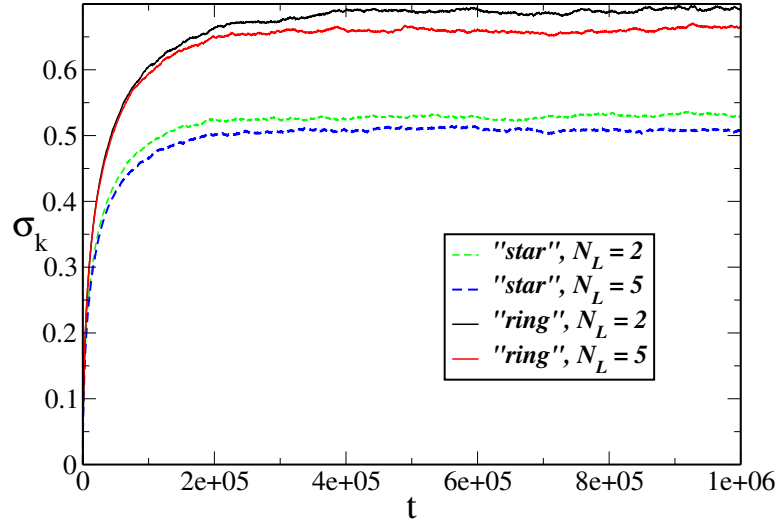

Figure S7: Effect of Volume Exclusion on  $\sigma_k$ , for different geometries and number of layers in the STCM.

## Number of particles in the system

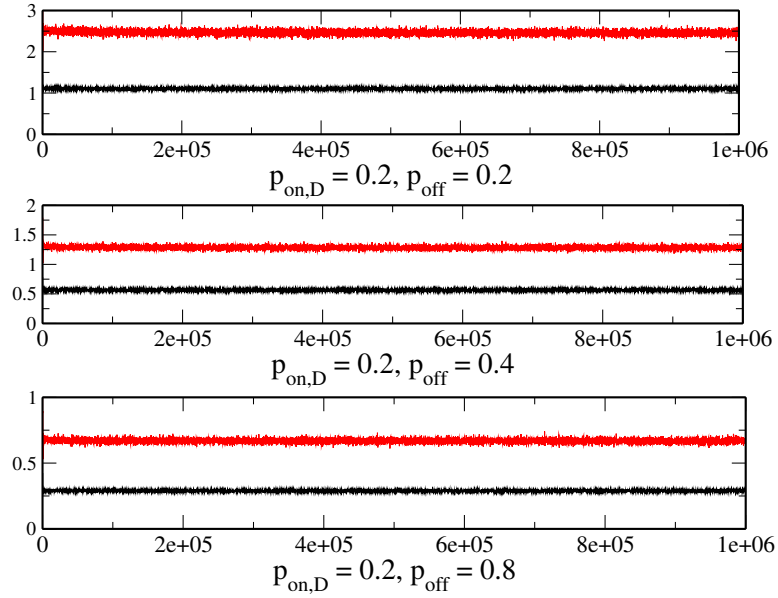

Figure S8: Influence of  $p_{off}$  and  $p_{on}$  on the number of bound and free particles. Black: ratio between bound  $D$  particles and free  $D$  particles as a function of time; Red: ratio between bound  $R$  particles and free  $R$  particles. Parameters used in the STCM are:  $F = 1.0$ ,  $t_u = 100$ ,  $f = 0.3$ .

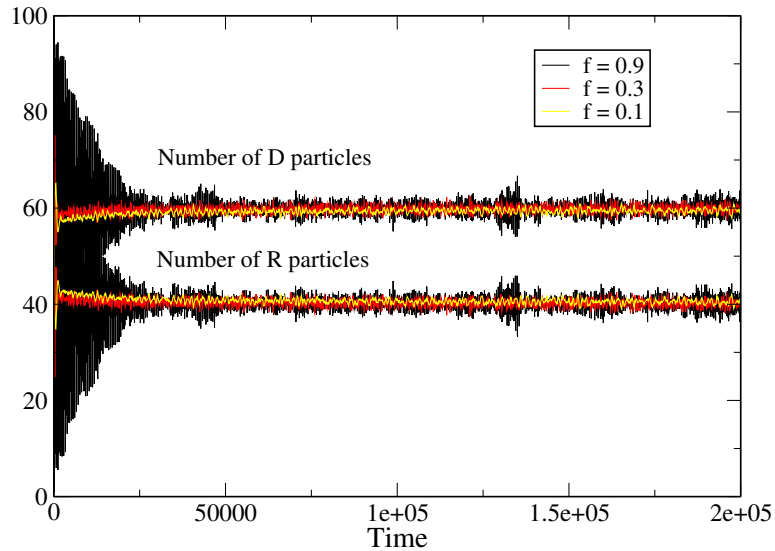

Figure S9: Influence of the parameter  $f$  on the STCM.

## Effect of Biased Diffusion

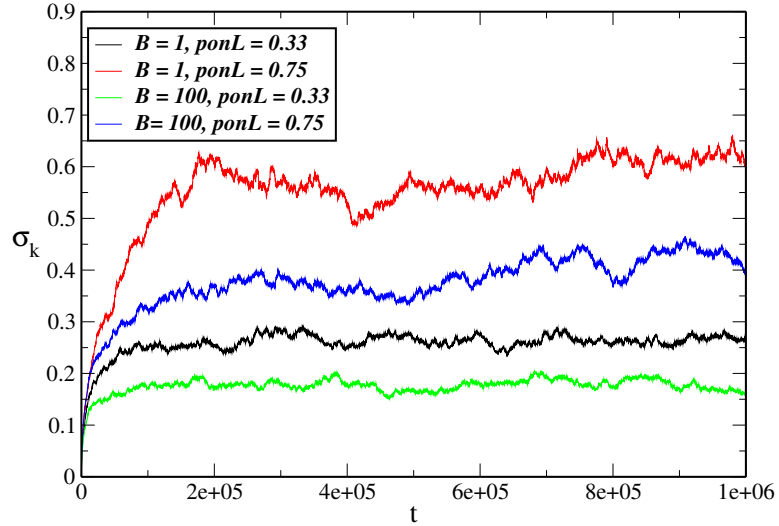

Figure S10: When particles move preferentially in one direction, the control mechanism becomes more efficient. The ratio of probabilities of stepping to the right and to the left is  $B$ . The probability of unbinding for  $R$  particles is  $p_{on,R} = 1 - (1 - p_{on,L} \exp(-F/k))$  so that  $p_{on,L}$  is the probability to bind to a spring with large stiffness.

## Effect of parameter $\gamma$

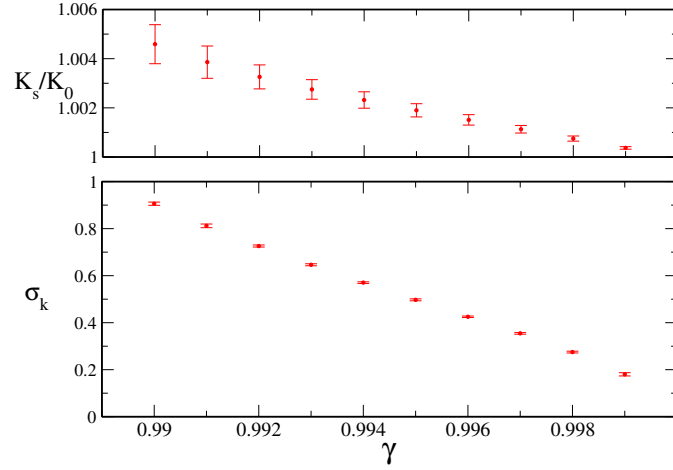

Figure S11: Normalized fiber stiffness  $K_s$  and Standard deviation of spring stiffnesses  $\sigma_s$  in the steady state as a function of  $\gamma$  in the STCM. Parameters used were  $F = 1.0$ ,  $t_u = 100$  and  $f = 0.3$ .

## Effect of $F$ on the on rate of D particles

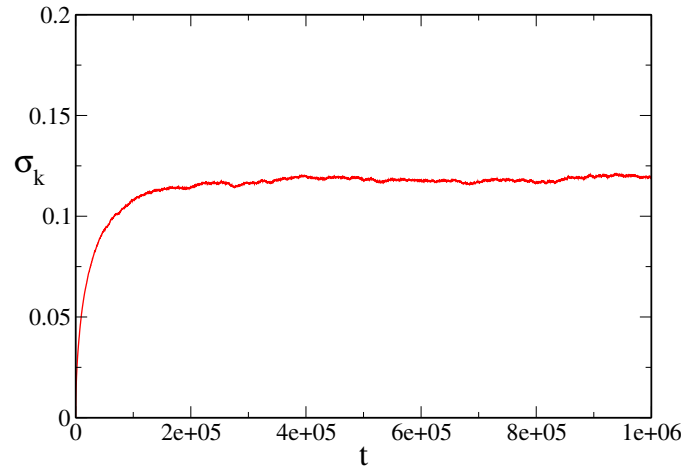

Figure S12: Standard deviation of spring stiffnesses when  $D$  particles are sensitive to tension, but  $R$  particles are not. Here, the probability for a  $D$  particle to bind to a spring with stiffness  $k$  is  $p_{on,D} = \frac{1}{1+F/k}$ . For  $R$  particles, the probability was kept constant and equal to  $p_{on,R} = \frac{1}{3}$ . Parameters used are  $F = 1.0$ ,  $t_u = 10$  and  $f = 0.3$ .
